# Supplementary material
Source: PubMed Central journal article supplement (PMC8085152)
Supplement: NIHMS1686837-supplement-1.pdf [file NIHMS1686837-supplement-1.pdf]

## SUPPLEMENTARY FIGURES

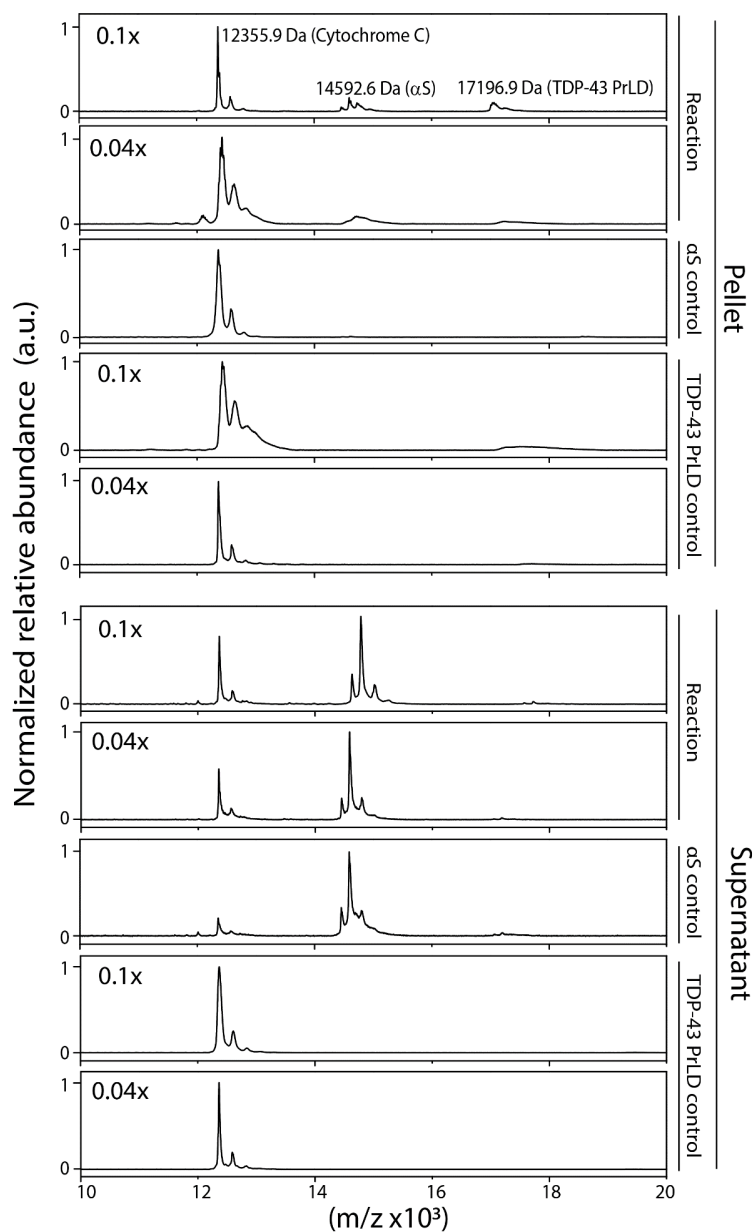

**Figure S1.** Quantification of  $\alpha$ S and TDP-43 PrLD in the supernatant and pellet of reactions in Figure 3 (d,e) by MALDI-ToF. Spectra were obtained after 72 hours, the reaction samples were centrifuged at 18,000  $\times g$  for 20 minutes and analyzed with reference to cytochrome-C as an external standard. (experimental details in materials and methods)

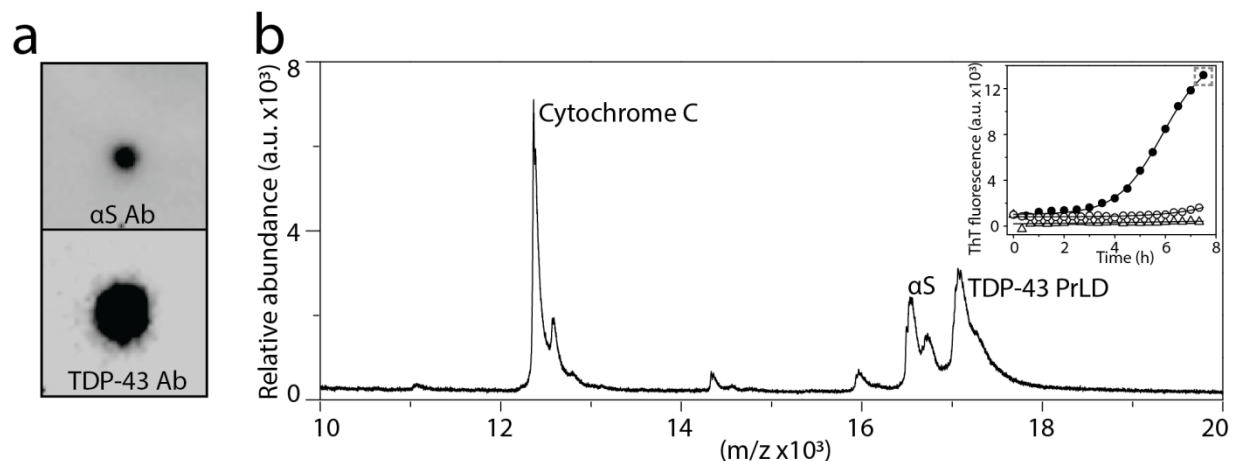

**Figure S2.** Detection and quantification of hybrid aggregates. a) Dot blot analysis of the pellet of reaction containing 20  $\mu\text{M}$  TDP-43 and 2  $\mu\text{M}$   $\alpha\text{S}$  in 20 mM MES buffer pH 6.0. Reactions were incubated at 37  $^{\circ}\text{C}$  for 24 hours, centrifuged at 18,000  $\times g$  for 20 minutes and analyzed using both  $\alpha\text{S}$  monoclonal antibody and TDP-43 polyclonal antibody (LifeSpan BioSciences, inc.). b) MALDI-ToF of the fibrils from ThT reaction (inset) containing 1:1 ratio of 20  $\mu\text{M}$  TDP-43 PrLD and  $\alpha\text{S}$  (●) in 20 mM MES buffer pH 6.0 analyzed at 7.5 hours at 37  $^{\circ}\text{C}$ , along with  $\alpha\text{S}$  ( $\Delta$ ) and TDP-43 PrLD ( $\circ$ ) controls. Reaction was centrifuged at 20,000  $\times g$  for 20 minutes, pellet was washed, and resuspended in MES buffer and analysed in the presence of cytochrome C as an external standard (experimental details in Materials and Methods).
